# Supplementary material for: Dynamic control of 2D non-Hermitian photonic corner skin modes in synthetic dimensions
Source: PubMed Central journal article supplement — Nat Commun. 2024 Dec 30;15:10881. doi: 10.1038/s41467-024-55236-4 (PMC11686390; doi:10.1038/s41467-024-55236-4), 2024-12-30
Supplement: 41467_2024_55236_MOESM3_ESM.pdf [file 41467_2024_55236_MOESM3_ESM.pdf]

## **Description of Additional Supplementary Files**

**Supplementary Movie 1: Dynamic Relocation.** Illustrative video of the Dynamic Relocation

**Supplementary Movie 2: Dynamic Tapering.** Illustrative video of the Dynamic Tapering

**Supplementary Movie 3: Funneling.** Illustrative video of the Funneling
